# Supplementary material
Source: Springer Nature journal article supplement (https://www.springermedizin.de/resource/supplementary/12913_2008_742_MOESM2_ESM.pdf/9535452)

# Cost Difference (£)

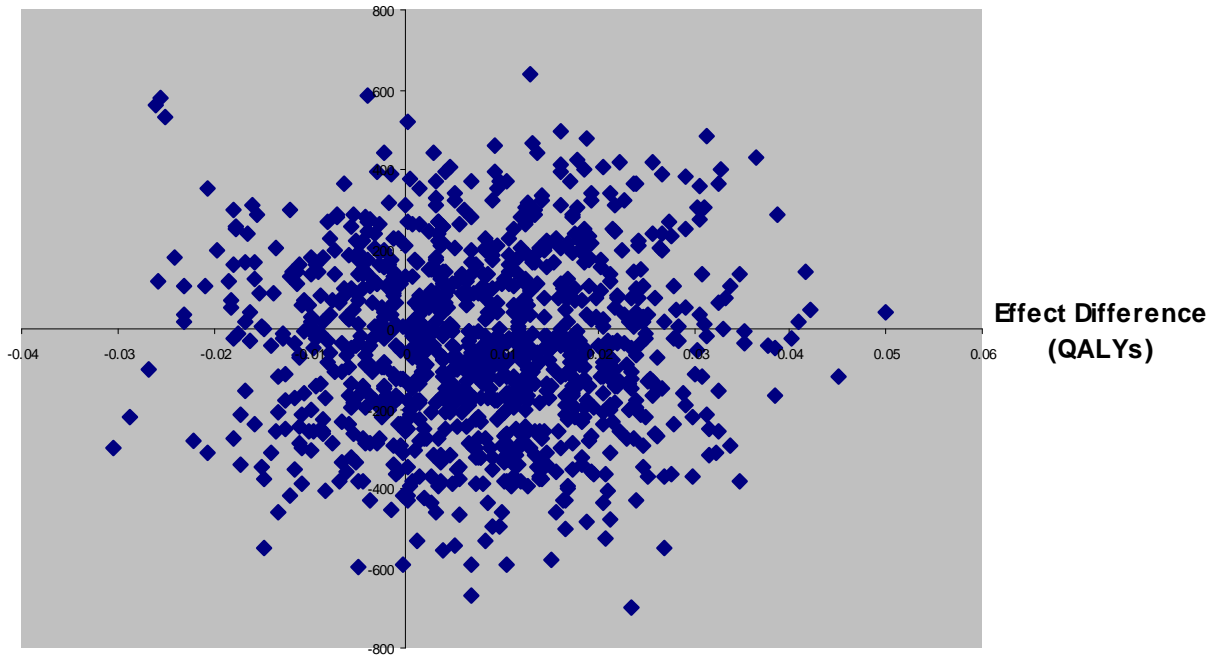

Supplement: MOESM2 [file 9535452]
